# Supplementary material for: Structure of the 4-O-[1-Carboxyethyl]-d-Mannose-Containing O-Specific Polysaccharide of a Halophilic Bacterium Salinivibrio sp. EG9S8QL
Source: MDPI journal article supplement (doi:10.3390/md19090508), 2021-09-07
Supplement: s1 [file s1]

Supplementary material  
for

**Structure of the 4-O-[1-Carboxyethyl]-D-Mannose-Containing O-specific Polysaccharide of a Halophilic Bacterium *Salinivibrio* sp. EG9S8QL**

**Elena N. Sigida,<sup>1,2,\*</sup> Ibrahim M. Ibrahim,<sup>3,4</sup> Maxim S. Kokoulin,<sup>5</sup> Hussein H. Abulreesh,<sup>6,7</sup> Khaled Elbanna,<sup>4,6,7</sup> Svetlana A. Konnova,<sup>1,3</sup> and Yulia P. Fedonenko,<sup>1,3</sup>**

<sup>1</sup> Institute of Biochemistry and Physiology of Plants and Microorganisms, Russian Academy of Sciences, 13 Prospekt Entuziastov, Saratov 410049, Russia; si\_elena@mail.ru

<sup>2</sup> N. D. Zelinsky Institute of Organic Chemistry, Russian Academy of Sciences, 47 Leninsky Prospekt, Moscow 119991, Russia

<sup>3</sup> N. G. Chernyshevsky Saratov State University, 83 Ulitsa Astrakhanskaya, Saratov 410012, Russia

<sup>4</sup> Department of Agricultural Microbiology, Faculty of Agriculture, Fayoum University, Fayoum 63514, Egypt

<sup>5</sup> G. B. Elyakov Pacific Institute of Bioorganic Chemistry, Far Eastern Branch of Russian Academy of Sciences, 159 Prospekt 100 let Vladivostoku, Vladivostok 690022, Russia

<sup>6</sup> Department of Biology, Faculty of Applied Science, Umm Al-Qura University, Makkah, Kingdom of Saudi Arabia.

<sup>7</sup> Research Laboratories Unit, Faculty of Applied Science, Umm Al-Qura University, Makkah, Kingdom of Saudi Arabia

\* Correspondence: si\_elena@mail.ru; Tel.: (007-8452-970044)

Journal: Marine Drugs

The following are included as supplementary information for current paper:

**Content**

|                |    |
|----------------|----|
| Table S1.....  | S2 |
| Figure S1..... | S3 |
| Figure S2..... | S4 |

**Table S1.** Comparative analysis of phenotypic features of strain EG9S8QL and closely related *Salinivibrio* species

| Characteristics                  | Strains            |                                               |                                                |
|----------------------------------|--------------------|-----------------------------------------------|------------------------------------------------|
|                                  | EG9S8QL            | <i>S. kushneri</i><br>LMG 29817 <sup>Ta</sup> | <i>S. costicola</i><br>DSM 11403 <sup>Tb</sup> |
| Site sampling                    | Lake Qarun, Egypt  | water ponds of salterns, Spain                | Hypersaline habitats                           |
| Cell morphology                  | Short, curved rods | Curved rods                                   | Curved rods                                    |
| Colony color                     | Cream-white        | Cream                                         | Cream                                          |
| Nitrate reduction                | -                  | +                                             | -                                              |
| NaCl range (optimum) (% , w/v)   | 3-20 (10)          | 2-20 (7.5)                                    | 0.5-20 (10)                                    |
| Temperature range (optimum) (°C) | 10-43 (30)         | 17-49 (37)                                    | 5.0-45 (37)                                    |
| pH range (optimum)               | 5.5-10 (8.0)       | 5.0-10 (7.4)                                  | 5.0-10 (7.5)                                   |
| Utilization of                   |                    |                                               |                                                |
| Galactose                        | -                  | nd                                            | -                                              |
| Fructose                         | -                  | -                                             | -                                              |
| Mannose                          | +                  | +                                             | -                                              |
| Ribose                           | -                  | +                                             | -                                              |
| Xylose                           | +                  | -                                             | +                                              |
| Maltose                          | -                  | +                                             | -                                              |
| Lactose                          | -                  | nd                                            | -                                              |
| Trehalose                        | +                  | -                                             | +                                              |
| Glycerol                         | +                  | +                                             | +                                              |
| Na-acetate                       | +                  | nd                                            | +                                              |
| Hydrolysis of                    |                    |                                               |                                                |
| Starch                           | -                  | +                                             | -                                              |
| Tween 80                         | +                  | -                                             | +                                              |

All strains are negative for spore formation, Gram reaction and utilization of arabinose and Na-citrate as a carbon source and positive for catalase and oxidase activities, gelatin and casein hydrolysis, and utilization of glucose and sucrose as a carbon source.

(+) growth or positive reaction, (-) no growth or negative reaction, (nd) no data

<sup>a</sup>data from [8], <sup>b</sup>data from Romano, I.; Gambacorta, A.; Lama, L.; Nicolaus, B.; Giordano, A. *Salinivibrio costicola* subsp. alcaliphilus subsp. nov., a haloalkaliphilic aerobe from Campania Region (Italy). *Syst Appl Microbiol.* **2005**. 28(1). 34-42; DOI: 10.1016/j.syapm.2004.10.001.

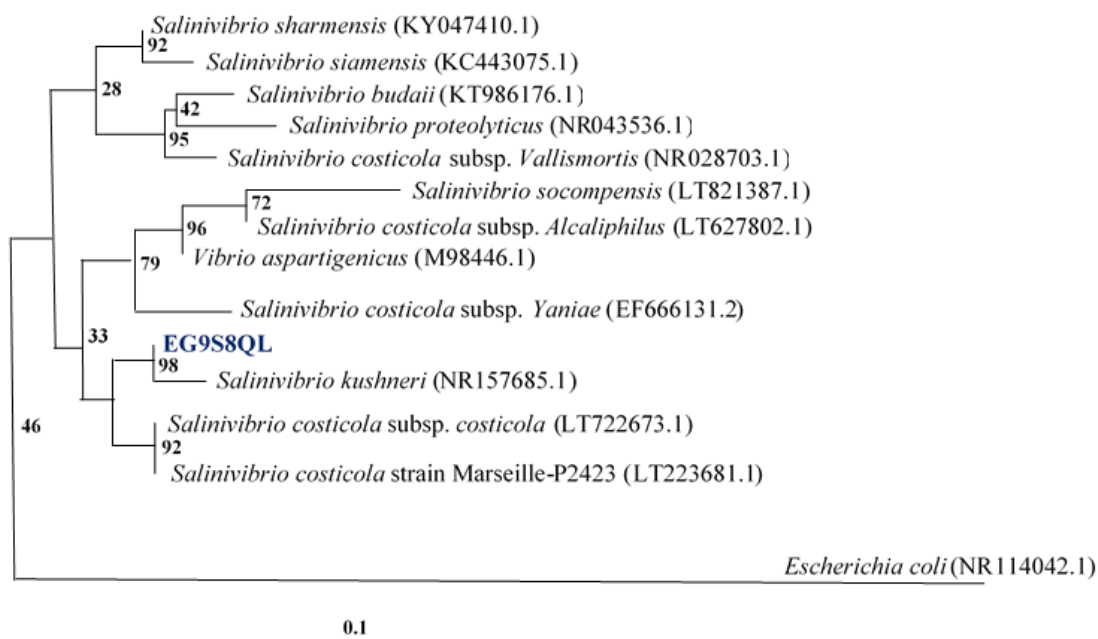

**Figure S1.** Neighbour-joining tree showing the phylogenetic position of strain EG9S8QL (with blue color) and its related neighbour strains based on 16S rRNA gene sequences. Bootstrap values (expressed as percentages of 100 replications) are shown at branch points. Bar 0.1 substitutions per nucleotide position

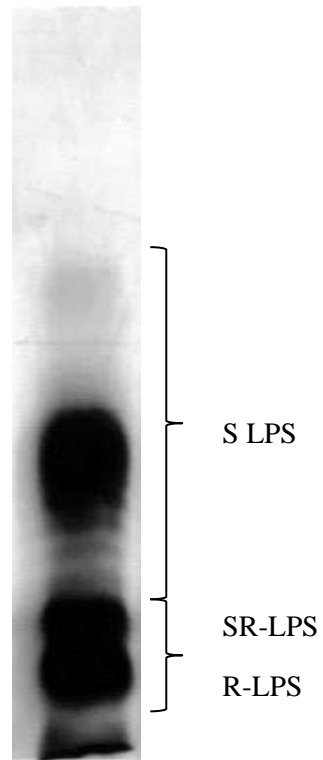

**Figure S2.** Silver-stained SDS PAGE of the LPS from *Salinivibrio* sp. EG9S8QL (20 µg)
